# Supplementary material for: LncRNA LINC01537 Promotes Gastric Cancer Metastasis and Tumorigenesis by Stabilizing RIPK4 to Activate NF-κB Signaling
Source: MDPI journal article supplement (doi:10.3390/cancers14215237), 2022-10-25
Supplement: s1 [file s1]

**Table S1: PCR Primer**

|                      | Sequence of Primer         |
|----------------------|----------------------------|
| GADPH-F              | GGACCTGACCTGCCGTCTAG       |
| GADPH-R              | GTAGCCCAGGATGCCCTTGA       |
| MALAT-1-F            | GAATTGCGTCATTATAAGCCTAGTT  |
| MALAT-1-R            | GTTTCATCCTACCACTCCCAATTAAT |
| LINC01537-F          | CACTTGTGGCATTATGTCGGT      |
| LINC01537-R          | CCTCTTAGGTAGGAATCTGGGTA    |
| RIPK4-F              | TGAGTGTGAACGCCCAGA         |
| RIPK4-R              | GAGCACAGGTCGATGAGGA        |
| NF- $\kappa$ B-p65-F | ATGTGGAGATCATTGAGCAGC      |
| NF- $\kappa$ B-p65-R | CCTGGTCCTGTGTAGCCATT       |
| Trim25-F             | AGCAGCTACAACAAGAATACACG    |
| Trim25-R             | GGCTCTGTTCAATCTCCTCCT      |

F:Forward primer; R:Reverse primer
