# Supplementary material for: LncRNA LINC01537 Promotes Gastric Cancer Metastasis and Tumorigenesis by Stabilizing RIPK4 to Activate NF-κB Signaling
Source: MDPI journal article supplement (doi:10.3390/cancers14215237), 2022-10-25
Supplement: s1 [file s1]

**Table S10: Source data for Figure 4M**

|           | NC    | Si-1  | Si-2  |
|-----------|-------|-------|-------|
| Target    |       |       |       |
| IP Trim25 | 24619 | 46721 | 38517 |
| IP IgG    | 1371  | 1061  | 1052  |
| Input     | 48172 | 52719 | 43171 |
| IP Trim25 | 47267 | 50228 | 47876 |

Data shown as Integrated Gray Density.
