# Supplementary material for: LncRNA LINC01537 Promotes Gastric Cancer Metastasis and Tumorigenesis by Stabilizing RIPK4 to Activate NF-κB Signaling
Source: MDPI journal article supplement (doi:10.3390/cancers14215237), 2022-10-25
Supplement: s1 [file s1]

**Table S2: SiRNA sequence**

|      | sense (5'-3' )            | antisense (5'-3' )        |
|------|---------------------------|---------------------------|
| si-1 | GCAUCUACUCACCAUCCUU<br>TT | AAGGAUGGUGAGUAGAUG<br>CTT |
| si-2 | GCUGGAGGCCUCCAAGAA<br>ATT | UUUCUUGGAGGCCUCCAG<br>CTT |
