# Supplementary material for: LncRNA LINC01537 Promotes Gastric Cancer Metastasis and Tumorigenesis by Stabilizing RIPK4 to Activate NF-κB Signaling
Source: MDPI journal article supplement (doi:10.3390/cancers14215237), 2022-10-25
Supplement: s1 [file s1]

**Table S11: Source data for Figure 6A**

| Target    | NC         | NC+inhibitor | OE         | OE+inhibitor |
|-----------|------------|--------------|------------|--------------|
| NF-kB-p65 | 19358/0.51 | 13250/0.36   | 37096/1.08 | 17226/0.51   |
| GADPH     | 38027      | 36721        | 34271      | 33916        |

Data shown as Integrated Gray Density or Integrated Gray Density/ relative expression.
