# Supplementary material for: LncRNA LINC01537 Promotes Gastric Cancer Metastasis and Tumorigenesis by Stabilizing RIPK4 to Activate NF-κB Signaling
Source: MDPI journal article supplement (doi:10.3390/cancers14215237), 2022-10-25
Supplement: s1 [file s1]

**Table S15: Source data for Figure S8**

| Target    | BGC-823    |            |             |            |
|-----------|------------|------------|-------------|------------|
|           | NC+Vector  | NC+RIPK4   | Si-1+Vector | Si-1+RIPK4 |
| NF-kB-p65 | 17625/0.47 | 29149/0.69 | 7582/0.18   | 25686/0.66 |
| GADPH     | 37261      | 42271      | 42591       | 39175      |

Data shown as Integrated Gray Density or Integrated Gray Density/Relative expression.
