# Supplementary material for: LncRNA LINC01537 Promotes Gastric Cancer Metastasis and Tumorigenesis by Stabilizing RIPK4 to Activate NF-κB Signaling
Source: MDPI journal article supplement (doi:10.3390/cancers14215237), 2022-10-25
Supplement: s1 [file s1]

**Table S6: Source data for Figure 4G**

| Table S3: Source data for Figure 1B |            |            |            |            |            |            |
|-------------------------------------|------------|------------|------------|------------|------------|------------|
| Target                              |            | AGS        |            |            |            |            |
|                                     |            | MG132      |            |            | DMSO       |            |
|                                     | NC         | Si-1       | Si-2       | NC         | Si-1       | Si-2       |
| RIPK4                               | 32070/0.95 | 29026/0.85 | 19265/0.54 | 28790/0.75 | 6460/0.15  | 10530/0.26 |
| GADPH                               | 33626      | 34102      | 35323      | 38229      | 41049      | 40544      |
| BGC-823                             |            |            |            |            |            |            |
|                                     |            | MG132      |            |            | DMSO       |            |
|                                     | NC         | Si-1       | Si-2       | NC         | Si-1       | Si-2       |
| RIPK4                               | 27864/1.14 | 24398/0.73 | 24791/0.83 | 24177/0.90 | 14624/0.43 | 14443/0.41 |
| GADPH                               | 24505      | 33294      | 30081      | 26945      | 34392      | 35381      |

Data shown as Integrated Gray Density or Integrated Gray Density/Relative expression.
