# Supplementary material for: LncRNA LINC01537 Promotes Gastric Cancer Metastasis and Tumorigenesis by Stabilizing RIPK4 to Activate NF-κB Signaling
Source: MDPI journal article supplement (doi:10.3390/cancers14215237), 2022-10-25
Supplement: s1 [file s1]

**Table S8: Source data for Figure 4I**

| Target | AGS        |            |            | BGC-823    |            |            |
|--------|------------|------------|------------|------------|------------|------------|
|        | NC         | Si-1       | Si-2       | NC         | Si-1       | Si-2       |
| Ub     | 132613/2.8 | 231461/4.4 | 223186/4.3 | 125861/2.4 | 226188/4.7 | 235161/4.9 |
|        | 9          | 1          | 7          | 3          | 6          | 9          |
| GADPH  | 45848      | 52542      | 51046      | 51610      | 47518      | 47148      |

Data shown as Integrated Gray Density or Integrated Gray Density/Relative expression.
