# Supplementary material for: LncRNA LINC01537 Promotes Gastric Cancer Metastasis and Tumorigenesis by Stabilizing RIPK4 to Activate NF-κB Signaling
Source: MDPI journal article supplement (doi:10.3390/cancers14215237), 2022-10-25
Supplement: s1 [file s1]

**Table S12: Source data for Figure S4**

| Target    | Left panel |            |            | Right panel |            |            |
|-----------|------------|------------|------------|-------------|------------|------------|
|           | NC         | Si-1       | Si-2       | NC          | Si-1       | Si-2       |
| RAF-1     | 30172/0.61 | 35821/0.81 | 39922/0.88 |             |            |            |
| p-RAF-1   | 39271/0.80 | 31817/0.72 | 42725/0.94 |             |            |            |
| MEK       | 42179/0.86 | 45217/1.02 | 43216/0.96 |             |            |            |
| p-MEK     | 49281/1.00 | 42716/0.97 | 47852/1.06 |             |            |            |
| ERK       | 38261/0.78 | 34726/0.78 | 39271/0.87 |             |            |            |
| STAT3     |            |            |            | 48171/0.92  | 43169/0.88 | 44662/0.97 |
| b-catenin |            |            |            | 38628/0.74  | 42818/0.87 | 39715/0.86 |
| GADPH     | 49172      | 44261      | 45214      | 52174       | 49217      | 46215      |

Data shown as Integrated Gray Density or Integrated Gray Density/Relative expression.
