# Supplementary material for: LncRNA LINC01537 Promotes Gastric Cancer Metastasis and Tumorigenesis by Stabilizing RIPK4 to Activate NF-κB Signaling
Source: MDPI journal article supplement (doi:10.3390/cancers14215237), 2022-10-25
Supplement: s1 [file s1]

**Table S4: Source data for Figure 4D**

| Target | F1    | F2   | F3    | F4    | F5   | F6   |
|--------|-------|------|-------|-------|------|------|
| RIPK4  | 28296 | 9081 | 11746 | 34192 | 4934 | 5683 |

Data shown as Integrated Gray Density.
