# Supplementary material for: LncRNA LINC01537 Promotes Gastric Cancer Metastasis and Tumorigenesis by Stabilizing RIPK4 to Activate NF-κB Signaling
Source: MDPI journal article supplement (doi:10.3390/cancers14215237), 2022-10-25
Supplement: s1 [file s1]

**Table S9: Source data for Figure 4L**

| Target | Input | IgG  | IP    |
|--------|-------|------|-------|
| RIPK4  | 34806 | 3033 | 38348 |
| Trim25 | 58418 | 3724 | 42816 |

Data shown as Integrated Gray Density.
