# Supplementary material for: LncRNA LINC01537 Promotes Gastric Cancer Metastasis and Tumorigenesis by Stabilizing RIPK4 to Activate NF-κB Signaling
Source: MDPI journal article supplement (doi:10.3390/cancers14215237), 2022-10-25
Supplement: s1 [file s1]

**Table S7: Source data for Figure 4H**

| Target |  | AGS     |         |         |         |         |         |         |         |
|--------|--|---------|---------|---------|---------|---------|---------|---------|---------|
|        |  | NC      |         |         |         | Si-1    |         |         |         |
|        |  | 0h      | 12h     | 24h     | 36h     | 0h      | 12h     | 24h     | 36h     |
| RIPK4  |  | 36516/0 | 19704/0 | 13307/0 | 7217/0. | 30018/1 | 12076/0 | 10068/0 | 1972/0. |
|        |  | .95     | .57     | .38     | 18      | .00     | .33     | .29     | 05      |
| GADPH  |  | 38454   | 34621   | 35429   | 39011   | 30106   | 36717   | 34131   | 37935   |
|        |  | BGC-823 |         |         |         |         |         |         |         |
|        |  | NC      |         |         |         | Si-1    |         |         |         |
|        |  | 0h      | 12h     | 24h     | 36h     | 0h      | 12h     | 24h     | 36h     |
| RIPK4  |  | 34376/0 | 18914/0 | 13400/0 | 13516/0 | 37226/0 | 24604/0 | 11257/0 | 3512/0. |
|        |  | .79     | .48     | .33     | .33     | .96     | .65     | .28     | 09      |
| GADPH  |  | 43537   | 39122   | 41131   | 41089   | 38908   | 37622   | 40442   | 39062   |

Data shown as Integrated Gray Density or Integrated Gray Density/Relative expression.
