# Supplementary material for: LncRNA LINC01537 Promotes Gastric Cancer Metastasis and Tumorigenesis by Stabilizing RIPK4 to Activate NF-κB Signaling
Source: MDPI journal article supplement (doi:10.3390/cancers14215237), 2022-10-25
Supplement: s1 [file s1]

**Table S3: Source data for Figure 4C**

| Target | 5% Input   | Antisense |             |
|--------|------------|-----------|-------------|
|        |            | LINC01537 | LINC01537   |
| RIPK4  | 45417/1.26 | 2148/3.58 | 38553/62.38 |
| GADPH  | 36010      | 600       | 618         |

Data shown as Integrated Gray Density or Integrated Gray Density/ relative expression.
