# Supplementary material for: LncRNA LINC01537 Promotes Gastric Cancer Metastasis and Tumorigenesis by Stabilizing RIPK4 to Activate NF-κB Signaling
Source: MDPI journal article supplement (doi:10.3390/cancers14215237), 2022-10-25
Supplement: s1 [file s1]

**Table S14: Source data for Figure S7**

| Target | AGS            |                |                 |                | BGC-823        |                |                 |                |
|--------|----------------|----------------|-----------------|----------------|----------------|----------------|-----------------|----------------|
|        | NC+Ve<br>ctor  | NC+RI<br>PK4   | Si-1+V<br>ector | Si-1+RI<br>PK4 | NC+Ve<br>ctor  | NC+RI<br>PK4   | Si-1+V<br>ector | Si-1+RI<br>PK4 |
| RIPK4  | 25601/0<br>.26 | 39525/0<br>.43 | 18261/0<br>.21  | 26505/0<br>.32 | 30281/<br>0.34 | 43625/0<br>.44 | 22714/0<br>.28  | 34271/0<br>.40 |
| GADPH  | 99826          | 92716          | 85171           | 82018          | 88271          | 98911          | 80144           | 86251          |

Data shown as Integrated Gray Density or Integrated Gray Density/Relative expression.
