# Supplementary material for: LncRNA LINC01537 Promotes Gastric Cancer Metastasis and Tumorigenesis by Stabilizing RIPK4 to Activate NF-κB Signaling
Source: MDPI journal article supplement (doi:10.3390/cancers14215237), 2022-10-25
Supplement: s1 [file s1]

**Table S5: Source data for Figure 4F**

| Target    | AGS        |            |            | BGC-823    |            |            |
|-----------|------------|------------|------------|------------|------------|------------|
|           | NC         | Si-1       | Si-2       | NC         | Si-1       | Si-2       |
| NF-Kb-p65 | 49805/1.09 | 25258/0.54 | 14842/0.30 | 57553/1.14 | 24537/0.44 | 22579/0.41 |
| RIPK4     | 48411/1.06 | 18090/0.39 | 22615/0.46 | 47661/0.94 | 32132/0.58 | 33190/0.61 |
| GADPH     | 45527      | 46892      | 49297      | 50510      | 55195      | 54753      |

Data shown as Integrated Gray Density or Integrated Gray Density/Relative expression.
