# Supplementary material for: LncRNA LINC01537 Promotes Gastric Cancer Metastasis and Tumorigenesis by Stabilizing RIPK4 to Activate NF-κB Signaling
Source: MDPI journal article supplement (doi:10.3390/cancers14215237), 2022-10-25
Supplement: s1 [file s1]

**Table S13: Source data for Figure S6**

| Target | AGS        |            |            | BGC-823    |            |            |
|--------|------------|------------|------------|------------|------------|------------|
|        | NC         | Si-1       | Si-2       | NC         | Si-1       | Si-2       |
| Trim25 | 57215/0.77 | 55681/0.77 | 49281/0.65 | 54271/0.87 | 56214/0.80 | 53095/0.85 |
| GADPH  | 74261      | 72514      | 75526      | 62319      | 70168      | 62184      |

Data shown as Integrated Gray Density or Integrated Gray Density/Relative expression.
