# Supplementary material for: LncRNA LINC01537 Promotes Gastric Cancer Metastasis and Tumorigenesis by Stabilizing RIPK4 to Activate NF-κB Signaling
Source: Cancers (Basel). 2022 Oct 25;14(21):5237. doi: 10.3390/cancers14215237 (PMC9657364; doi:10.3390/cancers14215237)
Supplement: Supplementary file 1 [file cancers-14-05237-s001.zip]

Archive with 37 entries (37 files):
- Figure S legend.pdf
- Figure S1.tif
- Figure S2.tif
- Figure S3.tif
- Figure S4.tif
- Figure S5.tif
- Figure S6.tif
- Figure S7.tif
- Figure S8.tif
- Source Western-blot Images for Figure 4C.tif
- Source Western-blot Images for Figure 4D.tif
- Source Western-blot Images for Figure 4F.tif
- Source Western-blot Images for Figure 4G.tif
- Source Western-blot Images for Figure 4H.tif
- Source Western-blot Images for Figure 4I.tif
- Source Western-blot Images for Figure 4L.tif
- Source Western-blot Images for Figure 4M.tif
- Source Western-blot Images for Figure 6A.tif
- Source Western-blot Images for Figure S4.tif
- Source Western-blot Images for Figure S6.tif
- Source Western-blot Images for Figure S7.tif
- Source Western-blot Images for Figure S8.tif
- Table S1.pdf
- Table S10.pdf
- Table S11.pdf
- Table S12.pdf
- Table S13.pdf
- Table S14.pdf
- Table S15.pdf
- Table S2.pdf
- Table S3.pdf
- Table S4.pdf
- Table S5.pdf
- Table S6.pdf
- Table S7.pdf
- Table S8.pdf
- Table S9.pdf
